# Supplementary material
Source: PubMed Central journal article supplement (PMC3406240)
Supplement: NIHMS362506-supplement-Supp_Table_S1.pdf [file NIHMS362506-supplement-Supp_Table_S1.pdf]

**Table S1 Quantitation of Proteins Shown in Figure 5D.**

|          |           | C      | T      | HcyL   | RL1    | RL2    | HRL    | E1     | E2     | ERL    |
|----------|-----------|--------|--------|--------|--------|--------|--------|--------|--------|--------|
| nSREBP1c | Average   | 0.1130 | 0.1665 | 0.0376 | 0.3636 | 0.2480 | 0.0441 | 0.1869 | 0.1673 | 0.4488 |
|          | SD        | 0.0146 | 0.0094 | 0.0171 | 0.1245 | 0.0690 | 0.0181 | 0.0448 | 0.0591 | 0.0722 |
|          | p value 1 |        | 0.0059 | 0.0044 | 0.0258 | 0.0295 | 0.0068 | 0.0531 | 0.1974 | 0.0014 |
|          | p value 2 |        |        |        |        |        |        |        |        | 0.0059 |
| PGC1     | Average   | 0.5778 | 0.2880 | 0.0389 | 0.4618 | 0.4572 | 0.0825 | 0.3516 | 0.3788 | 0.1212 |
|          | SD        | 0.0765 | 0.0450 | 0.0225 | 0.0689 | 0.1574 | 0.0474 | 0.0658 | 0.1080 | 0.0510 |
|          | p value 1 |        | 0.0048 | 0.0003 | 0.1226 | 0.2984 | 0.0007 | 0.0178 | 0.0598 | 0.0010 |
|          | p value 2 |        |        |        |        |        |        |        |        | 0.0087 |
| Derlin   | Average   | 0.6131 | 0.4378 | 0.2504 | 0.6319 | 0.6859 | 0.1442 | 0.5031 | 0.4725 | 0.4346 |
|          | SD        | 0.0179 | 0.0902 | 0.0736 | 0.0683 | 0.1129 | 0.1101 | 0.0530 | 0.1298 | 0.0943 |
|          | p value 1 |        | 0.0298 | 0.0012 | 0.6700 | 0.3323 | 0.0019 | 0.0271 | 0.1365 | 0.0322 |
|          | p value 2 |        |        |        |        |        |        |        |        | 0.3342 |
| CYP2E1   | Average   | 1.4986 | 1.7819 | 1.2681 | 0.4517 | 0.6180 | 2.0467 | 2.5888 | 1.8917 | 1.1952 |
|          | SD        | 0.1429 | 0.2309 | 0.2084 | 0.2204 | 0.2731 | 0.5343 | 0.5237 | 0.4534 | 0.2746 |
|          | p value 1 |        | 0.1451 | 0.5208 | 0.0023 | 0.0078 | 0.1612 | 0.0254 | 0.2254 | 0.1648 |
|          | p value 2 |        |        |        |        |        |        |        |        | 0.0151 |
| SERCA    | Average   | 2.9375 | 2.0278 | 1.3887 | 2.0116 | 2.1028 | 1.3627 | 2.5337 | 2.7768 | 1.8318 |
|          | SD        | 0.2340 | 0.3871 | 0.2275 | 0.3305 | 0.4843 | 0.2489 | 0.2018 | 0.5258 | 0.3128 |
|          | p value 1 |        | 0.0253 | 0.0012 | 0.0167 | 0.0548 | 0.0013 | 0.0863 | 0.6539 | 0.0080 |
|          | p value 2 |        |        |        |        |        |        |        |        | 0.5315 |

C, control; T, tunicamycin; HcyL, homocystein thiolactone; RL, ritonavir and lopinavir at 10 µg/ml (RL1) and 5 µg/ml (RL2); HRL, homocystein thiolactone plus RL at 5 µg/ml; E1, alcohol (85 mM); E2, alcohol (35 mM); ERL, RIT and LOP (10 µg/ml) plus alcohol at 85 mM; Protein quantity was normalized with Cyclin D; Comparisons were made between control and individual treatments (p value 1) or between RL1 and ERL (p value 2).
