# Supplementary material
Source: PubMed Central journal article supplement (PMC3406240)

# Supplemental Figure S1

**Control**

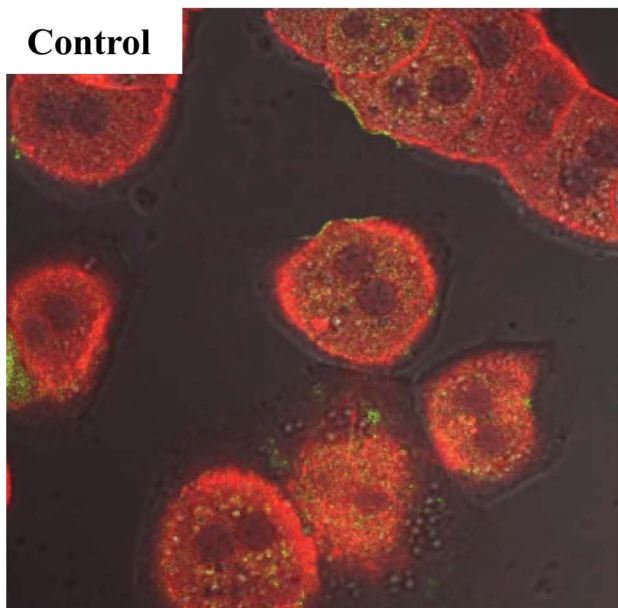

**Alcohol**

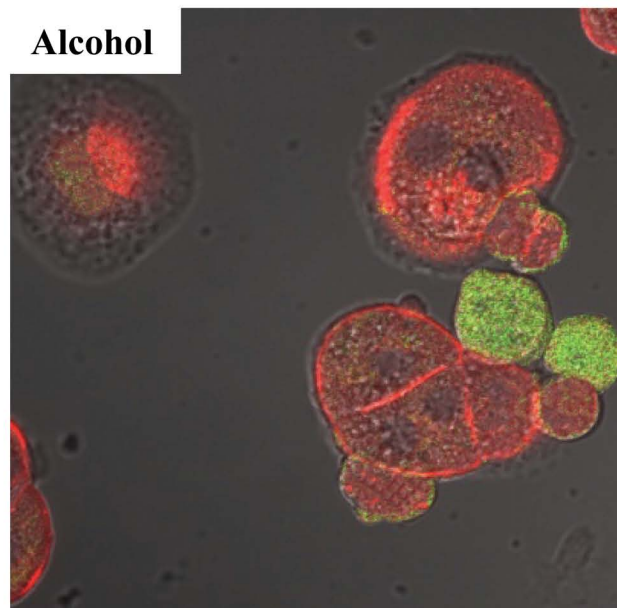

**RIT+LOP**

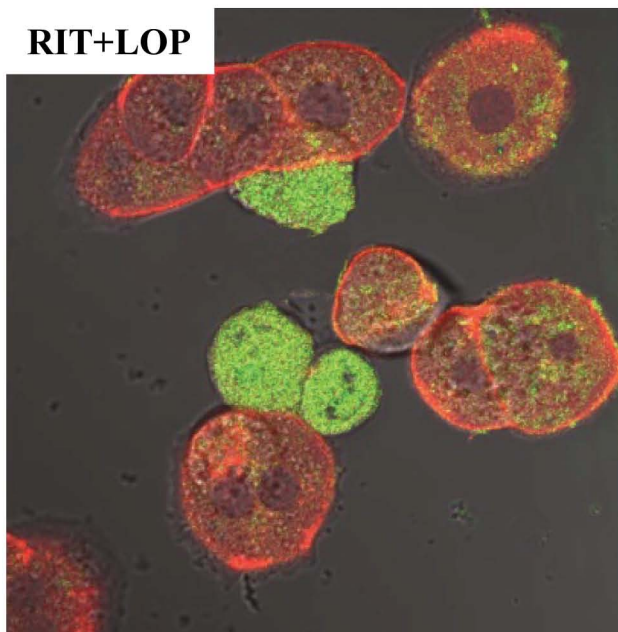

**Alcohol+RIT+LOP**

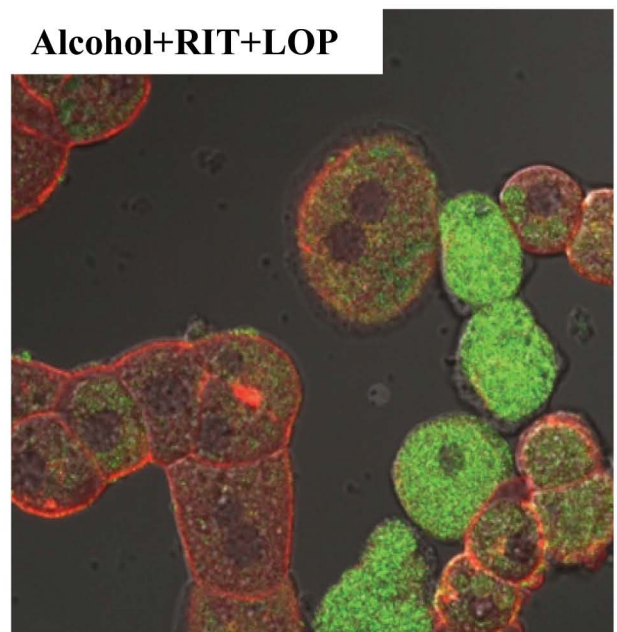

Supplement: NIHMS362506-supplement-Supp_Fig_S1.pdf [file NIHMS362506-supplement-Supp_Fig_S1.pdf]
